# Supplementary material
Source: PubMed Central journal article supplement (PMC3127168)
Supplement: NIHMS274118-supplement-1.pdf [file NIHMS274118-supplement-1.pdf]

SI. 1

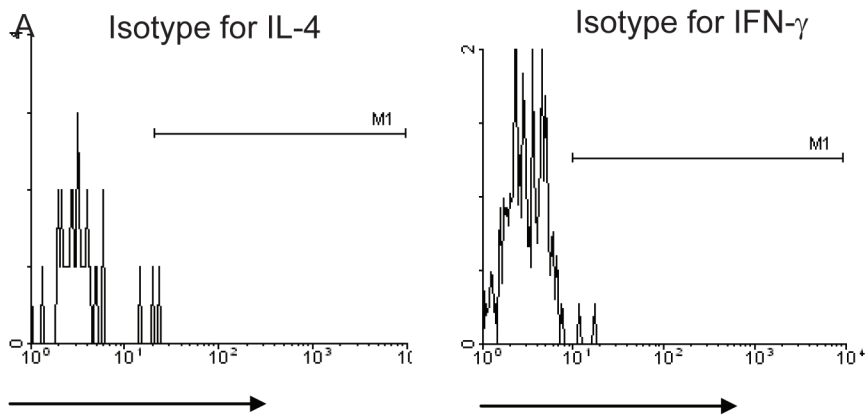

**B** Isotype for Brdu

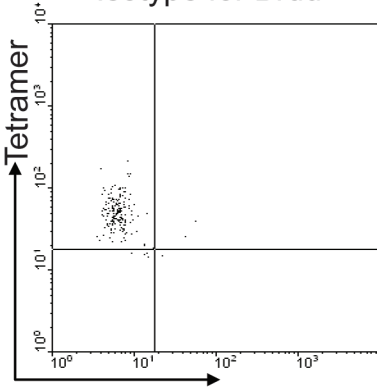

**C** Negative control  
for annexin V

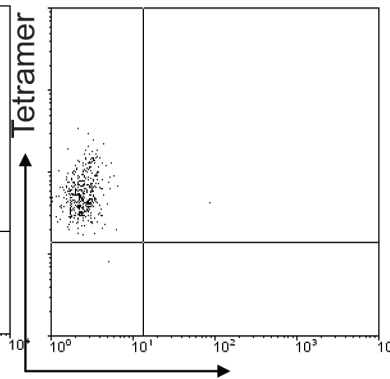

**D**

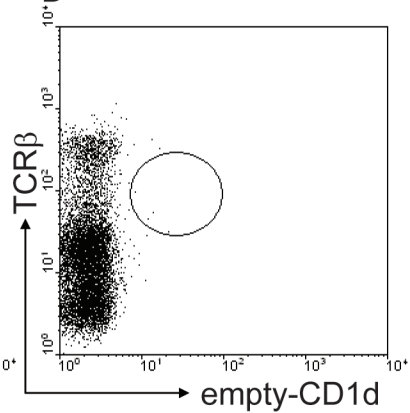

SI. 2

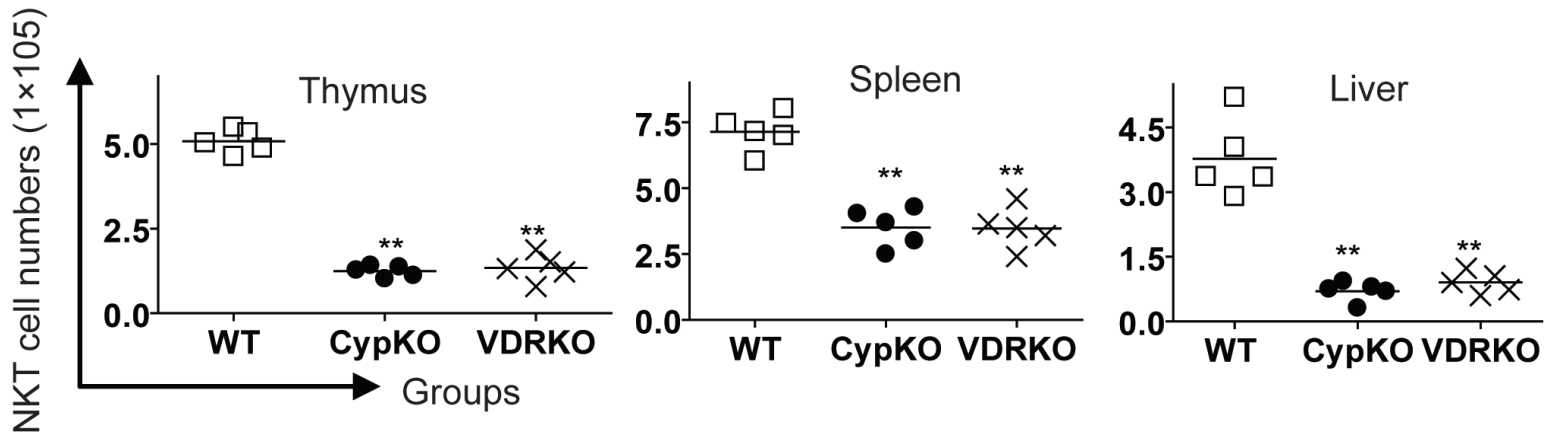

SI 3

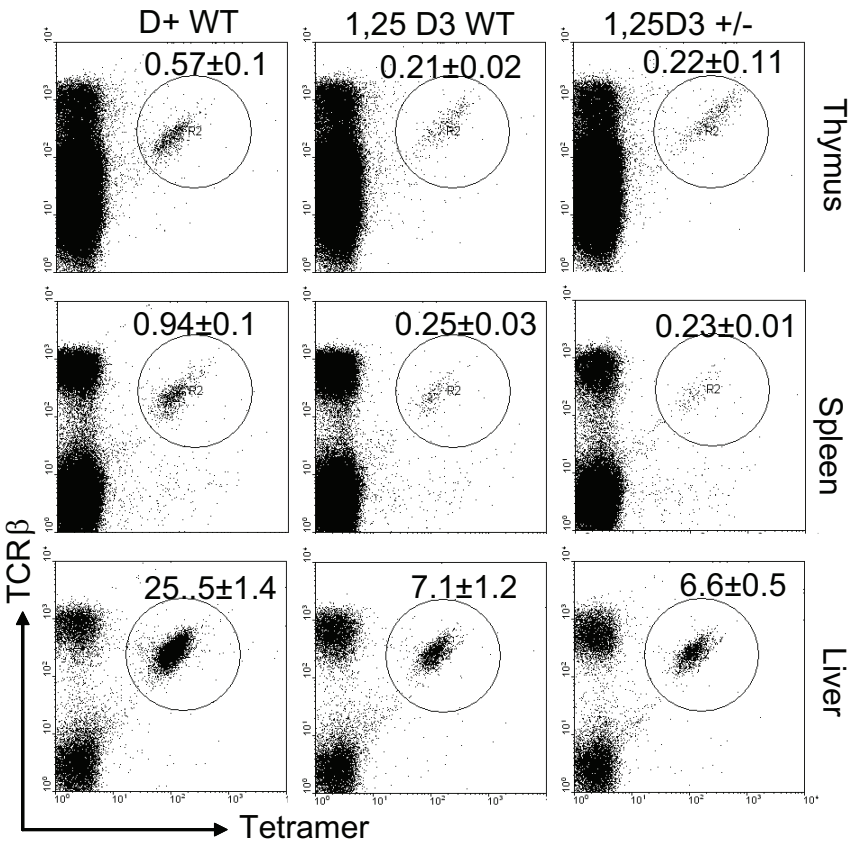

SI 4

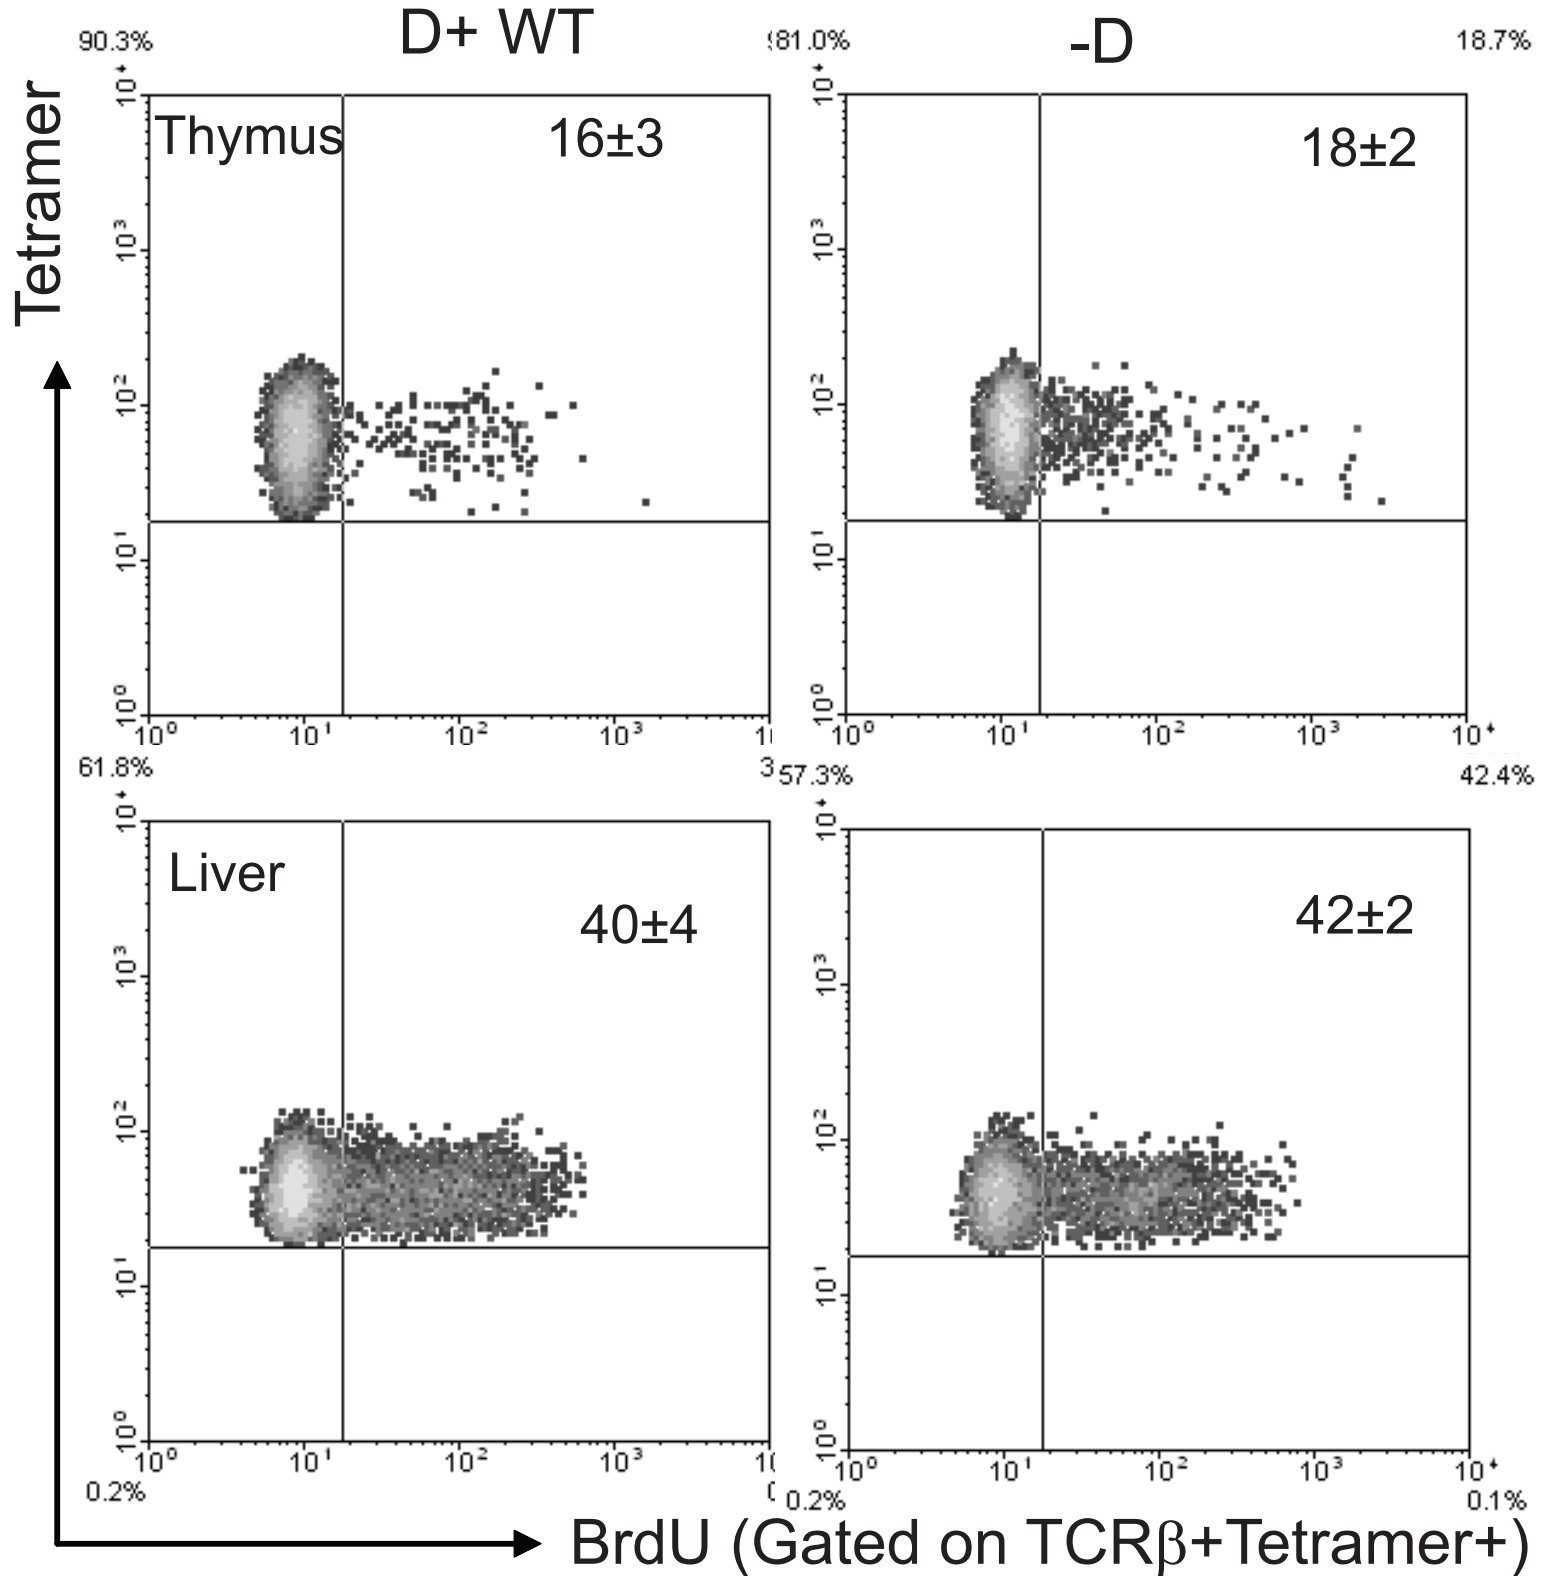

## Supplementary information

**Supplementary figure 1.** Negative control staining for flow cytometry. (A) TCR $\beta^+$  and  $\alpha$ GalCer-CD1d tetramer $^+$  cells are gated on. Histograms show isotype control for IL-4 (left panel) and IFN- $\gamma$  (right panel). (B) Histogram showing tetramer positive isotype control staining for BrdU. (C) Histogram shows negative control staining for annexin V gated on tetramer positive cells. (D) Dot plot showing TCR $\beta^+$  and empty CD1d control staining.

**Supplementary figure 2.** Reduced numbers of iNKT cells in 1,25D3 deficient mice. Total number of iNKT cells in the thymus, liver and spleen of WT, Cyp27B1 KO, and VDR KO mice (n=5). Line is the mean for the group. \*\*,  $p < 0.001$

**Supplementary figure 3.** Exposure to 1,25D3 at embryonic day 13 fails to rescue iNKT cell development. Breeders were fed D- diets and switched to 25ng/mouse/ day of 1,25D3 at embryonic day 13. Values are mean  $\pm$  SEM of n=5 mice per group. Percentage of iNKT cells in 1,25D3WT and 1,25D3 +/-ko is significantly lower than values from D+WT mice ( $p < 0.05$ ).

**Supplementary figure 4.** Vitamin D status does not affect homeostatic proliferation of iNKT cells. BrdU incorporation by iNKT cells from D+ WT and D- mice. Mice were injected ip with 100 $\mu$ l of 10 mg/ml BrdU dissolved in PBS at the onset of experiments. At the same time, mice were fed water that contained 0.8mg/ml BrdU/5% glucose mixture and the water was changed daily. 9d later thymocytes, and mononuclear cells from the liver were analyzed for BrdU incorporation using a BrdU flow kit and the

manufacturers instructions (BD Pharmingen). Dot plots showing percentage of BrdU positive iNKT cells in D+ WT and D- controls. Isotype control staining for BrdU is shown in supplementary Fig.1. Data show one representative of 8 mice per group. Values are mean  $\pm$  SEM. Numbers indicate percentage of BrdU positive iNKT cells.
